# Supplementary material for: Redox-active proligands from the direct connection of 1,3-dithiol-2-one to tetrathiafulvalene (TTF): syntheses, characterizations and metal complexation
Source: Royal Society of Chemistry journal article supplement (doi:10.1039/c3nj41097h), 2013-01-01
Supplement: c3nj41097h.pdf [file c3nj41097h.pdf]

## Supporting Information

# Redox-active proligands from the direct connection of 1,3-dithiol-2-one to tetrathiafulvalene (TTF): syntheses, characterizations and metal complexation

Franck Camerel,\* Olivier Jeannin, Gilles Yzambart, Bruno Fabre, Dominique Lorcy and Marc Fourmigué

Institut des Sciences Chimiques de Rennes, UMR 6226 CNRS-Université de Rennes 1, Matière Condensée et Systèmes Electroactifs (MaCSE), Campus de Beaulieu, 35042 Rennes, France. E-mail: [franck.camerel@univ-rennes1.fr](mailto:franck.camerel@univ-rennes1.fr)

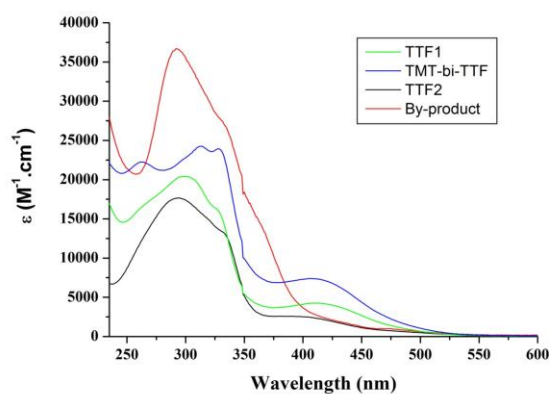

Figure S1. UV-vis absorption spectra of TTF1, TTF2, TMT-bi-TTF and by-product ( $c \sim 10^{-5} \text{ mol} \cdot \text{L}^{-1}$ ) in  $\text{CH}_2\text{Cl}_2$  at room temperature.
